1 **Rare variants in long non-coding RNAs are associated with blood lipid levels in the**  
2 **TOPMed Whole Genome Sequencing Study**

3 Yuxuan Wang<sup>1</sup>, Margaret Sunitha Selvaraj<sup>2,3,4</sup>, Xihao Li<sup>5</sup>, Zilin Li<sup>5,6,7</sup>, Jacob A. Holdcraft<sup>1</sup>,  
4 Donna K. Arnett<sup>8,9</sup>, Joshua C. Bis<sup>10</sup>, John Blangero<sup>11</sup>, Eric Boerwinkle<sup>12</sup>, Donald W. Bowden<sup>13</sup>,  
5 Brian E. Cade<sup>14,15</sup>, Jenna C. Carlson<sup>16,17</sup>, April P. Carson<sup>18</sup>, Yii-Der Ida Chen<sup>19</sup>, Joanne E.  
6 Curran<sup>11</sup>, Paul S. de Vries<sup>12</sup>, Susan K. Dutcher<sup>20</sup>, Patrick T. Ellinor<sup>21,22</sup>, James S. Floyd<sup>10,23</sup>,  
7 Myriam Fornage<sup>24</sup>, Barry I. Freedman<sup>25</sup>, Stacey Gabriel<sup>26</sup>, Soren Germer<sup>27</sup>, Richard A. Gibbs<sup>28</sup>,  
8 Xiuqing Guo<sup>19</sup>, Jiang He<sup>29,30</sup>, Nancy Heard-Costa<sup>31,32</sup>, Bertha Hildalgo<sup>33</sup>, Lifang Hou<sup>34</sup>,  
9 Marguerite R. Irvin<sup>33</sup>, Roby Joehanes<sup>35</sup>, Robert C. Kaplan<sup>36,37</sup>, Sharon LR. Kardia<sup>38</sup>, Tanika N.  
10 Kelly<sup>39</sup>, Ryan Kim<sup>40</sup>, Charles Kooperberg<sup>37</sup>, Brian G. Kral<sup>41</sup>, Daniel Levy<sup>31,35</sup>, Changwei Li<sup>30,29</sup>,  
11 Chunyu Liu<sup>1,31</sup>, Don Lloyd-Jone<sup>34</sup>, Ruth JF. Loos<sup>42,43</sup>, Michael C. Mahaney<sup>11</sup>, Lisa W. Martin<sup>44</sup>,  
12 Rasika A. Mathias<sup>41</sup>, Ryan L. Minster<sup>45</sup>, Braxton D. Mitchell<sup>46</sup>, May E. Montasser<sup>46</sup>, Alanna C.  
13 Morrison<sup>12</sup>, Joanne M. Murabito<sup>31,47</sup>, Take Naseri<sup>48</sup>, Jeffrey R. O'Connell<sup>46</sup>, Nicholette D.  
14 Palmer<sup>13</sup>, Michael H. Preuss<sup>42</sup>, Bruce M. Psaty<sup>10,23,49</sup>, Laura M. Raffield<sup>50</sup>, Dabeeru C. Rao<sup>51</sup>,  
15 Susan Redline<sup>52</sup>, Alexander P. Reiner<sup>23</sup>, Stephen S. Rich<sup>53</sup>, Muagututi'a Sefuiva Ruepena<sup>54</sup>,  
16 Wayne H-H. Sheu<sup>55</sup>, Jennifer A. Smith<sup>38</sup>, Albert Smith<sup>56</sup>, Hemant K. Tiwari<sup>57</sup>, Michael Y. Tsai<sup>58</sup>,  
17 Karine A. Viaud-Martinez<sup>59</sup>, Zhe Wang<sup>42</sup>, Lisa R. Yanek<sup>41</sup>, Wei Zhao<sup>38</sup>, NHLBI Trans-Omics  
18 for Precision Medicine (TOPMed) Consortium, Jerome I. Rotter<sup>19</sup>, Xihong Lin<sup>3,5,60</sup>, Pradeep  
19 Natarajan<sup>2,3,4</sup>, Gina M. Peloso<sup>1,\*</sup>

20  
21 <sup>1</sup>Department of Biostatistics, Boston University School of Public Health, Boston, MA, USA,

22 <sup>2</sup>Cardiovascular Research Center and Center for Genomic Medicine, Massachusetts General

23 Hospital, Boston, MA, USA, <sup>3</sup>Program in Medical and Population Genetics, Broad Institute of

24 Harvard and MIT, Cambridge, MA, USA, <sup>4</sup>Department of Medicine, Harvard Medical School,  
25 Boston, MA, USA, <sup>5</sup>Department of Biostatistics, Harvard T.H. Chan School of Public Health,  
26 Boston, MA, USA, <sup>6</sup>Department of Biostatistics and Health Data Science, Indiana University  
27 School of Medicine, Indianapolis, IN, USA, <sup>7</sup>Center for Computational Biology &  
28 Bioinformatics, Indiana University School of Medicine, Indianapolis, IN, USA, <sup>8</sup>Provost Office,  
29 University of South Carolina, Columbia, SC, USA, <sup>9</sup>Department of Epidemiology and  
30 Biostatistics, University of South Carolina Arnold School of Public Health, Columbia, SC, USA,  
31 <sup>10</sup>Cardiovascular Health Research Unit, Department of Medicine, University of Washington,  
32 Seattle, WA, USA, <sup>11</sup>Department of Human Genetics and South Texas Diabetes and Obesity  
33 Institute, University of Texas Rio Grande Valley School of Medicine, Brownsville, TX, USA,  
34 <sup>12</sup>Human Genetics Center, Department of Epidemiology, Human Genetics, and Environmental  
35 Sciences, School of Public Health, The University of Texas Health Science Center at Houston,  
36 Houston, TX, USA, <sup>13</sup>Department of Biochemistry, Wake Forest University School of Medicine,  
37 Winston-Salem, NC, USA, <sup>14</sup>Department of Medicine, Brigham and Women's Hospital, Boston,  
38 MA, USA, <sup>15</sup>Division of Sleep Medicine, Harvard Medical School, Boston, MA, USA,  
39 <sup>16</sup>Department of Human Genetics, School of Public Health, University of Pittsburgh, Pittsburgh,  
40 PA, USA, <sup>17</sup>Department of Biostatistics, School of Public Health, University of Pittsburgh,  
41 Pittsburgh, PA, USA, <sup>18</sup>Department of Medicine, University of Mississippi Medical Center,  
42 Jackson, MS, USA, <sup>19</sup>The Institute for Translational Genomics and Population Sciences,  
43 Department of Pediatrics, The Lundquist Institute for Biomedical Innovation at Harbor-UCLA  
44 Medical Center, Torrance, CA, USA, <sup>20</sup>The McDonnell Genome Institute, Washington  
45 University School of Medicine, St. Louis, MO, USA, <sup>21</sup>Cardiovascular Research Center,  
46 Massachusetts General Hospital, Boston, MA, USA, <sup>22</sup>Cardiovascular Disease Initiative, The

47 Broad Institute of MIT and Harvard, Cambridge, MA, USA, <sup>23</sup>Department of Epidemiology,  
48 University of Washington, Seattle, WA, USA, <sup>24</sup>Center for Human Genetics, University of Texas  
49 Health at Houston, Houston, TX, USA, <sup>25</sup>Department of Internal Medicine, Nephrology, Wake  
50 Forest University School of Medicine, Winston-Salem, NC, USA, <sup>26</sup>Broad Institute of Harvard  
51 and MIT, Cambridge, MA, USA, <sup>27</sup>New York Genome Center, New York, NY, USA, <sup>28</sup>Baylor  
52 College of Medicine Human Genome Sequencing Center, Houston, TX, USA, <sup>29</sup>Department of  
53 Epidemiology, Tulane University School of Public Health and Tropical Medicine, New Orleans,  
54 LA, USA, <sup>30</sup>Tulane University Translational Science Institute, New Orleans, LA, USA,  
55 <sup>31</sup>Framingham Heart Study, Framingham, MA, USA, <sup>32</sup>Department of Neurology, Boston  
56 University Chobanian & Avedisian School of Medicine, Boston, MA, USA, <sup>33</sup>Department of  
57 Epidemiology, University of Alabama at Birmingham School of Public Health, Birmingham,  
58 AL, USA, <sup>34</sup>Department of Preventive Medicine, Northwestern University, Chicago, IL, USA,  
59 <sup>35</sup>Population Sciences Branch, Division of Intramural Research, National Heart, Lung, and Blood  
60 Institute, National Institutes of Health, Bethesda, MD, USA, <sup>36</sup>Department of Epidemiology and  
61 Population Health, Albert Einstein College of Medicine, Bronx, NY, USA, <sup>37</sup>Division of Public  
62 Health Sciences, Fred Hutchinson Cancer Center, Seattle, WA, USA, <sup>38</sup>Department of  
63 Epidemiology, University of Michigan, Ann Arbor, MI, USA, <sup>39</sup>Department of Medicine,  
64 Division of Nephrology, University of Illinois Chicago, Chicago, IL, USA, <sup>40</sup>Psomagen, Inc.  
65 (formerly Macrogen USA), Rockville, MD, USA, <sup>41</sup>GeneSTAR Research Program, Department  
66 of Medicine, Johns Hopkins University School of Medicine, Baltimore, MD, USA, <sup>42</sup>The  
67 Charles Bronfman Institute for Personalized Medicine, Icahn School of Medicine at Mount Sinai,  
68 New York, NY, USA, <sup>43</sup>NNF Center for Basic Metabolic Research, University of Copenhagen,  
69 Copenhagen, Denmark, <sup>44</sup>George Washington University School of Medicine and Health

70 Sciences, Washington, DC, USA, <sup>45</sup>Department of Human Genetics and Department of  
71 Biostatistics, University of Pittsburgh, Pittsburgh, PA, USA, <sup>46</sup>Department of Medicine,  
72 University of Maryland School of Medicine, Baltimore, MD, USA, <sup>47</sup>Department of Medicine,  
73 Boston Medical Center, Boston University Chobanian and Avedisian School of Medicine,  
74 Boston, MA, USA, <sup>48</sup>Ministry of Health, Apia, Samoa, <sup>49</sup>Department of Health Systems and  
75 Population Health, University of Washington, Seattle, WA, USA, <sup>50</sup>Department of Genetics,  
76 University of North Carolina at Chapel Hill, Chapel Hill, NC, USA, <sup>51</sup>Division of Biostatistics,  
77 Washington University School of Medicine, St. Louis, MO, USA, <sup>52</sup>Department of Medicine,  
78 Brigham and Women's Hospital, Harvard Medical School, Boston, MA, USA, <sup>53</sup>Center for  
79 Public Health Genomics, University of Virginia, Charlottesville, VA, USA, <sup>54</sup>Lutia i Puava ae  
80 Mapu i Fagalele, Apia, Samoa, <sup>55</sup>National Health Research Institute (NHRI), Taiwan,  
81 <sup>56</sup>Department of Biostatistics, University of Michigan, Ann Arbor, MI, USA, <sup>57</sup>Department of  
82 Biostatistics, University of Alabama, Birmingham, AL, USA, <sup>58</sup>Department of Laboratory  
83 Medicine and Pathology, University of Minnesota, Minneapolis, MN, USA, <sup>59</sup>Illumina  
84 Laboratory Services, Illumina Inc., San Diego, CA, USA, <sup>60</sup>Department of Statistics, Harvard  
85 University, Cambridge, MA, USA

86

87

88

89

90

91

92

93 \*Corresponding author:  
94 Gina M. Peloso, PhD  
95 Department of Biostatistics  
96 Boston University School of Public Health  
97 Boston, MA 02118  
98 [gpeloso@bu.edu](mailto:gpeloso@bu.edu)  
99 Abstract word counts: 240  
100 Text word counts: 4787  
101 No. of references: 56  
102 No. of figures: 3  
103 No. of tables: 1

104 **Abstract**

105 Long non-coding RNAs (lncRNAs) are known to perform important regulatory functions. Large-  
106 scale whole genome sequencing (WGS) studies and new statistical methods for variant set tests  
107 now provide an opportunity to assess the associations between rare variants in lncRNA genes  
108 and complex traits across the genome. In this study, we used high-coverage WGS from 66,329  
109 participants of diverse ancestries with blood lipid levels (LDL-C, HDL-C, TC, and TG) in the  
110 National Heart, Lung, and Blood Institute (NHLBI) Trans-Omics for Precision Medicine  
111 (TOPMed) program to investigate the role of lncRNAs in lipid variability. We aggregated rare  
112 variants for 165,375 lncRNA genes based on their genomic locations and conducted rare variant  
113 aggregate association tests using the STAAR (variant-Set Test for Association using Annotation  
114 information) framework. We performed STAAR conditional analysis adjusting for common  
115 variants in known lipid GWAS loci and rare coding variants in nearby protein coding genes. Our  
116 analyses revealed 83 rare lncRNA variant sets significantly associated with blood lipid levels, all  
117 of which were located in known lipid GWAS loci (in a  $\pm 500$  kb window of a Global Lipids  
118 Genetics Consortium index variant). Notably, 61 out of 83 signals (73%) were conditionally  
119 independent of common regulatory variations and rare protein coding variations at the same loci.  
120 We replicated 34 out of 61 (56%) conditionally independent associations using the independent  
121 UK Biobank WGS data. Our results expand the genetic architecture of blood lipids to rare  
122 variants in lncRNA, implicating new therapeutic opportunities.

## 123 **Introduction**

124 Blood lipid levels, including low-density lipoprotein cholesterol (LDL-C), total cholesterol (TC),  
125 triglyceride (TG), high-density lipoprotein cholesterol (HDL-C), are quantitative clinically  
126 important traits with well-described monogenic and polygenic bases<sup>1-19</sup>. Abnormal blood lipid  
127 levels contribute to risk of coronary heart disease (CHD) and, in clinical practice, several  
128 treatments, including statins, PCSK9 and ANGPTL3 inhibitors<sup>20-22</sup>, are available to reduce the  
129 risk of developing CHD. Each of these therapeutics has supporting evidence of their efficacy  
130 from human genetic analysis of blood lipid levels<sup>21-23</sup>.

131  
132 Long non-coding RNAs (lncRNAs) are broadly defined as transcripts greater than 200  
133 nucleotides in length that biochemically resemble mRNAs but do not code for proteins<sup>24</sup>.  
134 lncRNAs are known to perform important regulatory functions in lipid metabolism<sup>25-27</sup>. Rare  
135 variants (RVs) in lncRNAs have not been systematically explored for their impact on blood lipid  
136 levels as they are not comprehensively genotyped or imputed on non-WGS platforms. In  
137 addition, there are difficulties in defining testing units and selecting qualifying variants<sup>28</sup>.  
138 Rapidly growing knowledge about the regulatory elements of the non-coding genome<sup>29-33</sup>, large-  
139 scale WGS studies<sup>34-36</sup>, and new statistical methods<sup>37-39</sup> for variant set tests provide the  
140 possibility to assess the associations between plasma lipid traits and the genome-wide impact of  
141 lncRNAs.

142  
143 We examined the associations of rare variants in lncRNA genes from high-coverage WGS of  
144 66,329 participants from diverse ancestry who have blood lipid traits (LDL-C, HDL-C, TC and  
145 TG) in the National Heart, Lung, and Blood Institute (NHLBI) Trans-omics for Precision

146 Medicine (TOPMed) program freeze 8 data<sup>34</sup>. We show that the rare noncoding variants in  
147 lncRNA genes located near known Mendelian dyslipidemia genes contribute to phenotypic  
148 variation in lipid levels among unselected individuals from population-based cohorts biobanks  
149 independently of common variants associated with blood lipid levels.

150

## 151 **Results**

### 152 *Overview*

153 We performed a comprehensive evaluation of the association between quantitative blood lipid  
154 traits and rare variants in lncRNA genes across the genome (**Figure 1**). We systematically  
155 curated more than 165k lncRNA genes from the union of four human genome lncRNA  
156 annotations, including GENCODE<sup>29,30</sup>, FANTOM5 CAT<sup>31</sup>, NONCODE<sup>32</sup> and lncRNAKB<sup>33</sup>.  
157 We utilized the TOPMed Freeze 8 dataset of 66,329 participants from 21 studies with WGS and  
158 measured blood lipid levels and performed the rare variant (MAF <1%) association tests of  
159 curated lncRNA genes with four blood lipid phenotypes: LDL-C, HDL-C, TC, and TG. We  
160 further conducted the conditional analysis adjusting for known genome-wide association study  
161 (GWAS) variants from the Global Lipids Genetics Consortium (GLGC)<sup>18</sup>. Associations between  
162 lncRNA genes and lipids that were conditionally independent from the GWAS variants  
163 (conditional  $P$  value < 6.0e-04) were then tested using STAAR procedure for conditional  
164 analysis adjusting for rare nonsynonymous variants (MAF < 1%) within the closest protein  
165 coding gene and the nearby known lipid monogenic genes in the region. We performed  
166 replication in ~140K genomes from UK Biobank<sup>40</sup>. We intersected our results with the gene  
167 expression signatures of lipid traits in 1,505 participants from the Framingham Heart Study



168 (FHS)<sup>41</sup> with RNA-seq data and blood lipid levels and observed evidence that the lncRNA RVs  
 169 may both influence their gene expression levels and impact lipid traits.

170

171 **Figure 1. A schematic illustration of the study.**

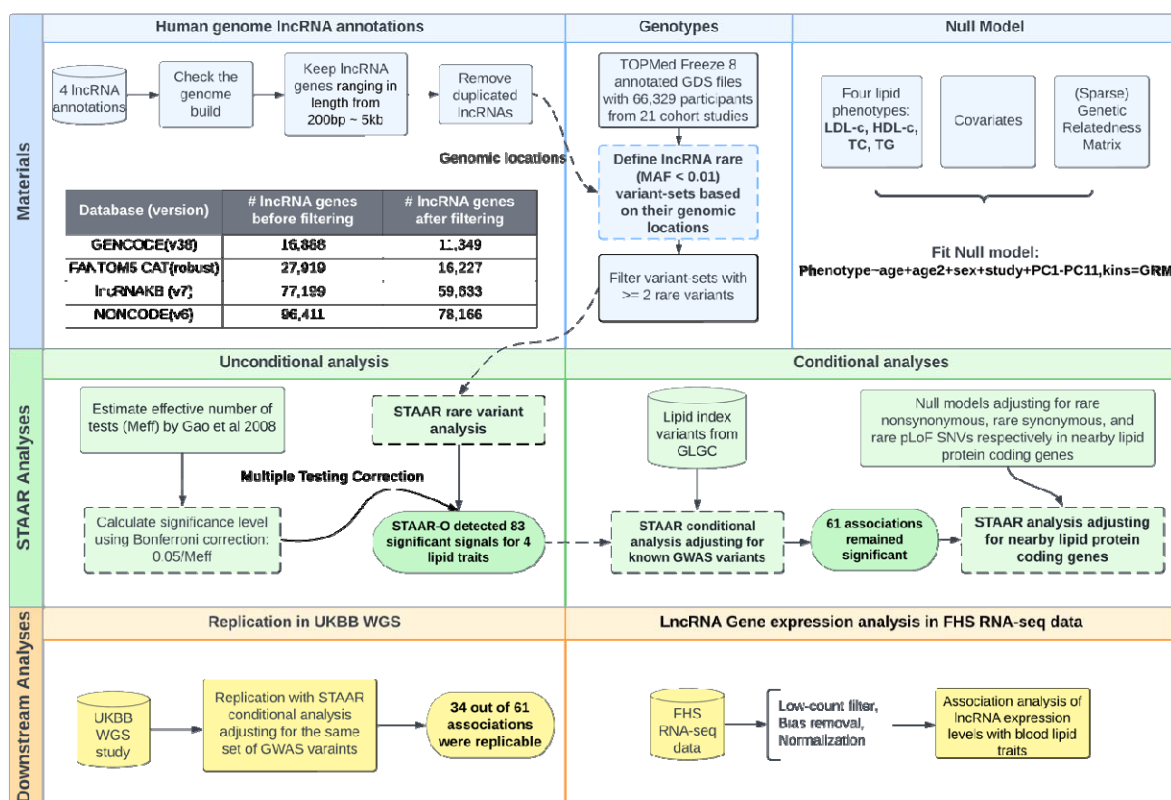

172

173

### 174 *Characteristics of TOPMed participants*

175 We included 66,329 diverse participants from 21 cohort studies in the NHLBI TOPMed

176 consortium with blood lipid levels. The discovery cohorts consisted of 29,502 (44.5%) self-

177 reported White, 16,983 (25.6%) self-reported Black, 13,943 (21.0%) self-reported Hispanic,

178 4,719 (7.1%) self-reported Asian, and 1,182 (1.8%) self-reported Samoan participants

179 (Supplementary Table 1, Supplementary Text). Among the 66,329 participants, 41,182 (62%)

180 were female. The mean age of the 66,329 participants was 53 years (SD = 15). The mean ages at  
181 lipid measurement varied across 21 cohorts from 25 years (SD = 3.56) for the Coronary Artery  
182 Risk Development in Young Adults (CARDIA) to 73 years (SD = 5.38) for the Cardiovascular  
183 Health Study (CHS). We observed that the Amish cohort had a higher concentration of LDL-C  
184 (140 [SD = 43] mg/dL) and HDL-C (56 [SD = 16] mg/dL) as well as lower TG (median 63 [IQR  
185 = 50] mg/dL) consistent with the known founder mutations in *APOB* and *APOC3*<sup>35</sup>.

186

### 187 *Identification of rare lncRNA variants associated with blood lipid traits*

188 We defined lncRNA testing units using the available genomic positions in four genome  
189 annotation projects described in the **Methods**. There were 11,349 lncRNA genes obtained from  
190 GENCODE<sup>29,30</sup>, 16,227 from FANTOM5 CAT<sup>31</sup>, 78,166 from NONCODE<sup>32</sup> and 59,633 from  
191 lncRNAKB<sup>33</sup>. In total, we tested 165,375 lncRNA genes, among which, the average number of  
192 rare variants in each lncRNA was 483 (SD = 572). The minimum and the maximum number of  
193 rare variants among the lncRNAs being tested are 2 and 2947, respectively.

194

195 Our aggregation of lncRNAs across four lncRNA resources led to an overlap in the lncRNA  
196 units, leading to non-independent tests of association of the lncRNAs with blood lipid levels. We  
197 estimated the effective number of tests ( $M_{eff}$ ) using a principal component analysis (PCA) based  
198 approach<sup>42</sup> since the traditional Bonferroni correction would be too conservative and reduce  
199 power to detect association with blood lipid levels<sup>28</sup>.  $M_{eff}$  was estimated as 111,550, providing a  
200 significance threshold of  $\alpha = 0.05/111,550 = 4.5 \times 10^{-7}$ .

201

202

203 **Table 1. Summary of significant lncRNA associations for unconditional analysis,**  
 204 **conditional analyses, and replication.**

| Method                                                                                                          | LDL-C | TC | HDL-C | TG | Total No. |
|-----------------------------------------------------------------------------------------------------------------|-------|----|-------|----|-----------|
| <b>STAAR Unconditional analysis*</b>                                                                            | 28    | 20 | 19    | 16 | 83        |
| <b>Conditioning on known lipid-associated variants **</b>                                                       | 20    | 14 | 15    | 12 | 61        |
| <b>Conditioning on rare nonsynonymous variants within the closest gene and nearby lipid monogenic genes ***</b> | 18    | 13 | 15    | 12 | 58        |
| <b>Conditioning on rare synonymous variants within the closest gene and nearby lipid monogenic genes ***</b>    | 20    | 14 | 15    | 12 | 61        |
| <b>Conditioning on rare pLoF variants within the closest gene and nearby lipid monogenic genes ***</b>          | 20    | 14 | 15    | 12 | 61        |
| <b>Replication in UKBB WGS ***</b>                                                                              | 13    | 7  | 8     | 6  | 34        |

205 \* Bonferroni correction level of  $0.05/111,550 = 4.5e-07$

206 \*\*Bonferroni correction level of  $0.05/83 = 6.0e-04$

207 \*\*\*Bonferroni correction level of  $0.05/61 = 8.2e-04$

208

209 We applied STAAR (variant-Set Test for Association using Annotation infoRmation)

210 framework<sup>37,38</sup> to identify the lncRNA rare variant (RV) sets that associated with quantitative

211 lipid traits (LDL-C, HDL-C, TC and TG) using TOPMed WGS data. STAAR-O identified 83

212 genome-wide significant associations (28 with LDL-C, 20 with TC, 19 with HDL-C, and 16 with

213 TG) (**Table 1, Supplementary Table 2**). Among the 83 genome-wide significant associations,  
214 there are 54 unique lncRNAs. We observed that all the significant associations in the  
215 unconditional analysis were in the known lipid GWAS loci (defined as a  $\pm 500$  kb window  
216 beyond a Global Lipids Genetics Consortium index variant)<sup>18</sup>. We performed a sensitivity  
217 analysis aggregating only exonic and splicing variants in lncRNA genes and observed consistent  
218 results to our primary analysis results (**Supplementary Figure 1**).

219

### 220 *Conditional analyses of trait-associated lncRNAs adjusting for known GWAS*

#### 221 *variants and nonsynonymous variants within the nearby lipid monogenic genes*

222 After conditioning on known lipid-associated variants in a  $\pm 500$  kb window beyond a variant  
223 set<sup>18</sup>, 61 out of 83 associations (73%) remained significant (20 with LDL-C, 14 with TC, 15 with  
224 HDL-C, and 12 with TG) at the Bonferroni corrected level of  $0.05/83 = 6.0 \times 10^{-4}$ , indicating  
225 that the associations between the lncRNA genes and lipid levels are distinct from the known  
226 GWAS variants. The most significant association for LDL-C and TC was the lncRNA  
227 NONHSAG026007.2 (chr19:44,892,420-44,903,056) near the *APOE-APOC1* region.

228 NONHSAG026007.2 remained significantly associated with LDL-C ( $P$  value =  $2.44 \times 10^{-15}$ ) and  
229 TC ( $P$  value =  $2.17 \times 10^{-27}$ ) after adjusting for nearby known lipid-associated variants (**Figure 2**).

230 The most significant associations for HDL-C and TG were NONHSAG063125.1

231 (chr11:116,790,241-116,805,983) and NONHSAG09700.3 (chr11: 116,773,068-116,779,841),

232 respectively, both near *APOA5-APOC3-APOA1* region. NONHSAG063125.1 remained similarly  
233 associated after conditioning on known lipid GWAS variants, while NONHSAG09700.3 became

234 even more significant (**Figure 2**). We then conditioned the GWAS-distinct associations on the

235 rare nonsynonymous variants within the closest protein coding gene and nearby lipid monogenic

236 genes and observed that most (94.9%) of the lncRNA associations with lipid levels remained  
237 significant (**Table 1; Supplementary Figure 2**). Additionally, when conditioned on the rare  
238 synonymous variants or rare pLoF variants within the closest protein coding gene and nearby lipid  
239 monogenic genes, the number of associations remained as same as those GWAS-distinct  
240 associations (**Table 1; Supplementary Figure 3**).

241

### 242 *Replication of significant lncRNA-blood lipid trait associations*

243 Replication of 61 lncRNAs associated with blood lipid levels was evaluated in 139,849 UK  
244 Biobank individuals with WGS and blood lipid levels (**Supplementary Table 3**). We replicated  
245 34 out of 61 (56%) lncRNA associations with blood lipid levels at a Bonferroni-corrected  
246 threshold of  $0.05/61 = 8.2e-04$  (**Supplementary Table 2**). The most significant associations in  
247 the UK Biobank replication were NONHSAG025996.2 (chr19: 44,694,720-44,696,054) near  
248 *APOE-APOC1* region for LDL-C, NONHSAG109604.1 near *APOE-APOC1* region for TC,  
249 NONHSAG009700.3 near *APOA5-APOC3-APOA1* region for both HDL-C and TG  
250 (**Supplementary Table 2**), which were consistent with the results from TOPMed.

251

252 **Figure 2. Significantly associated lncRNAs with four blood lipid traits (STAAR-O *P* value**  
253 **< 4.5e-07).** The lncRNA genes are ordered by chromosome, followed by genomic positions.  
254 Dots in red and blue represent the  $-\log_{10}(\text{STAAR-O } P \text{ value})$  of the STAAR unconditional and  
255 conditional analysis adjusting for known lipid-associated GWAS variants, respectively. The  
256 black dashed line is the Bonferroni correction level of  $0.05/83 = 6.0e-04$ . Arrows indicate at least  
257  $10^4$  fold change of STAAR-O *P* values comparing the unconditional analysis and conditional  
258 analysis adjusting for known lipid-associated GWAS variants.

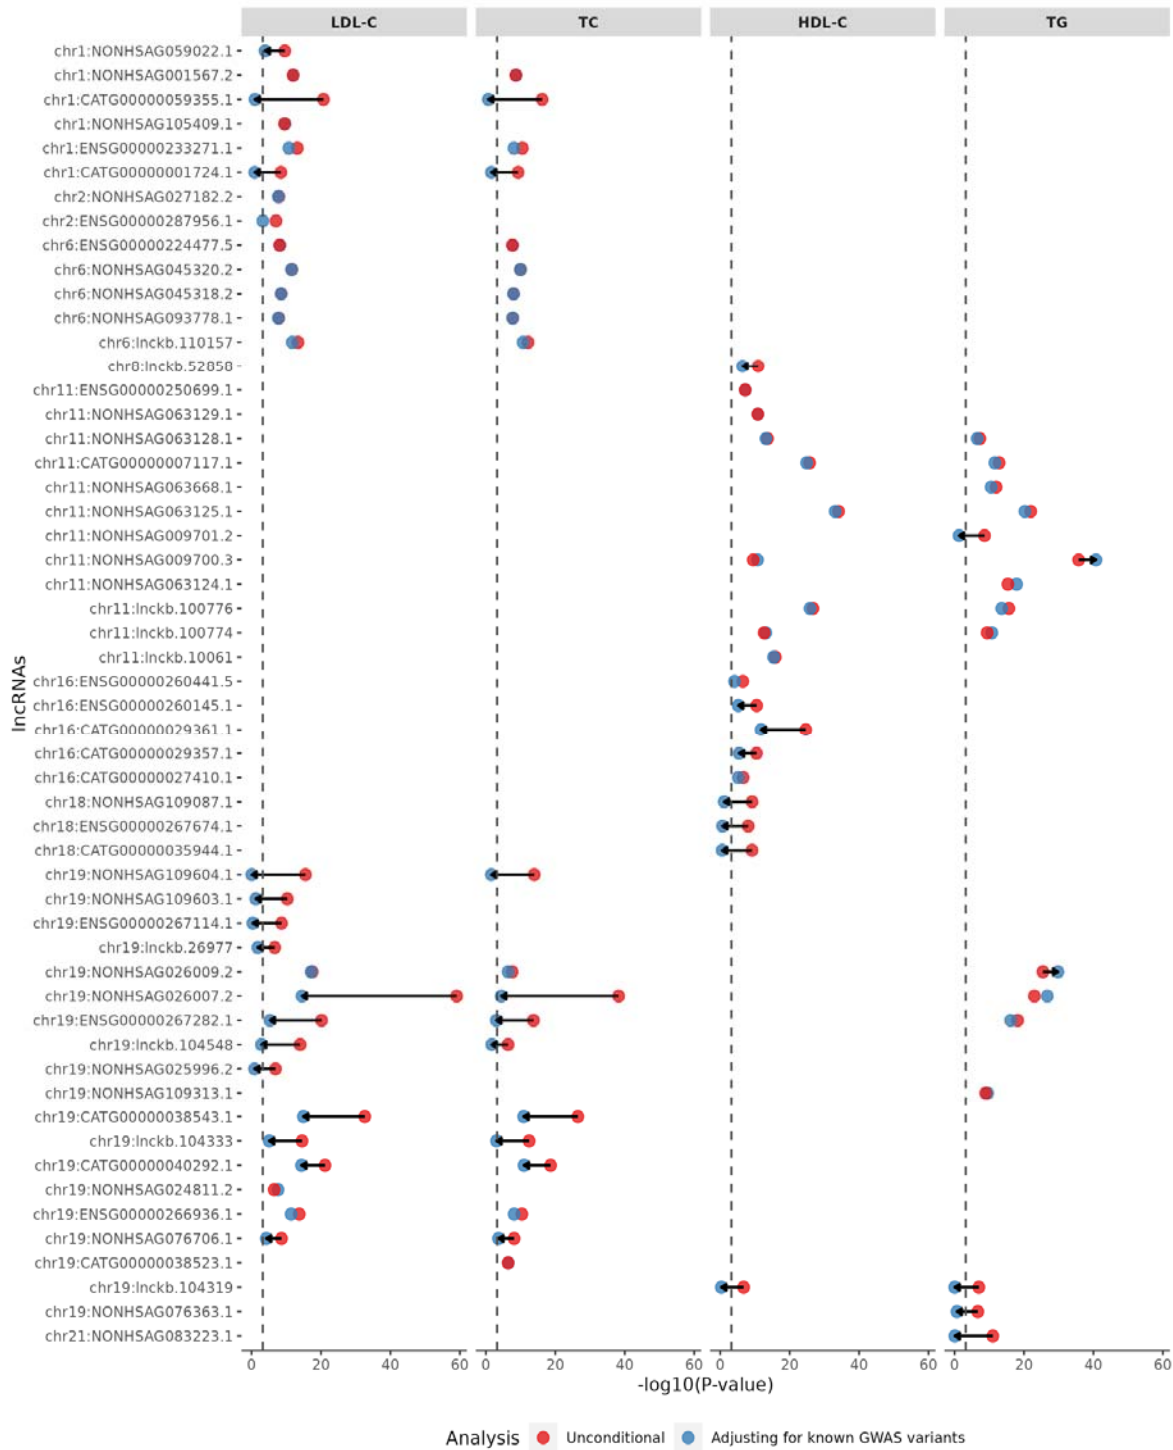

259

260

261

## 262 *lncRNA gene expression analysis in FHS RNA-seq data*

263 We overlapped the significant lipid-associated lncRNA genes with the lncRNA genes available  
264 in the Framingham Heart Study (FHS) RNA-seq data generated by TOPMed<sup>43</sup>. Since the gene-  
265 level expression data in FHS is annotated by GENCODE v30, we limited the lncRNA genes to  
266 those presented in GENCODE. Among the 54 unique lncRNA genes that are significantly  
267 associated with either one of the lipid traits using TOPMed WGS data, 10 lncRNA genes are  
268 annotated by GENCODE, and 8 out of 10 can be found in the FHS data. We performed  
269 association analyses of expression levels of those 8 significant lipid-associated lncRNA genes  
270 with blood lipid levels (LDL-C, TC, HDL-C, TG) (**Supplementary Text, Supplementary**  
271 **Table 4**). In total, we tested 12 associations of lncRNA gene expression with blood lipid level  
272 (**Supplementary Table 4**). The small proportion of overlapping was partially due to lncRNA  
273 genes' generally lower expression. The lowly expressed genes were filtered out when processing  
274 the gene expression data.

275  
276 Four associations achieved Bonferroni-adjusted significance, including the gene expression level  
277 of ENSG00000267282.1 (chr19:44,881,088-44,890,922) associated with LDL-C, TC, and TG,  
278 and the gene expression level of ENSG00000266936.1 (chr19:11,010,917-11,016,011)  
279 associated with TC. ENSG00000267282.1 is an antisense of *NECTIN2* (also known as *PVRL2*)  
280 (**Figure 3**). The nectin cell adhesion molecule 2 (*NECTIN2*) protein is a cell adhesion molecule  
281 involved in lipid metabolism<sup>44</sup>. Additionally, ENSG00000267282.1 was one of the lncRNA  
282 associations that we replicated in the independent UK Biobank (**Supplementary Table 2**). We  
283 also queried whether the RVs in this lipid-associated lncRNA led to an alteration of the  
284 corresponding lncRNA levels in the blood. However, due to the small number of overlapping

285 individuals between FHS RNA-seq data and TOPMed WGS data ( $N = 512$ ), the number of RVs  
286 tested in ENSG00000267282.1 for the association of its gene expression level was only 59.  
287 Compared with the original analysis using all 66,329 individuals for the association with lipid  
288 levels, the number of RVs tested in ENSG00000267282.1 is 1417. As a result, the association of  
289 the RVs in the ENSG00000267282.1 with ENSG00000267282.1 gene expression levels in blood  
290 was not significant (STAAR-O  $P$  value = 0.68).

291

292 **Figure 3. lncRNAs in the APOE region associated with LDL-C.** Upper panel shows the -  
293  $\log_{10}$ (STAAR-O  $P$  value) of the STAAR unconditional analysis, STAAR conditional analysis  
294 adjusting on known lipid GWAS variants, and STAAR conditional analysis adjusting for rare  
295 non-synonymous variants within the closest protein-coding gene and nearby lipid monogenic  
296 genes. The bottom panel is the nearby protein coding genes with the genomic coordinates. The  
297 vertical dashed line is the position of the known GWAS variants that were conditioned on. The  
298 black horizontal dashed line is the Bonferroni correction level of  $0.05/111,550 = 4.5e-07$ , and the  
299 gray horizontal dashed line is the Bonferroni correction level of  $0.05/83 = 6.0e-04$ .



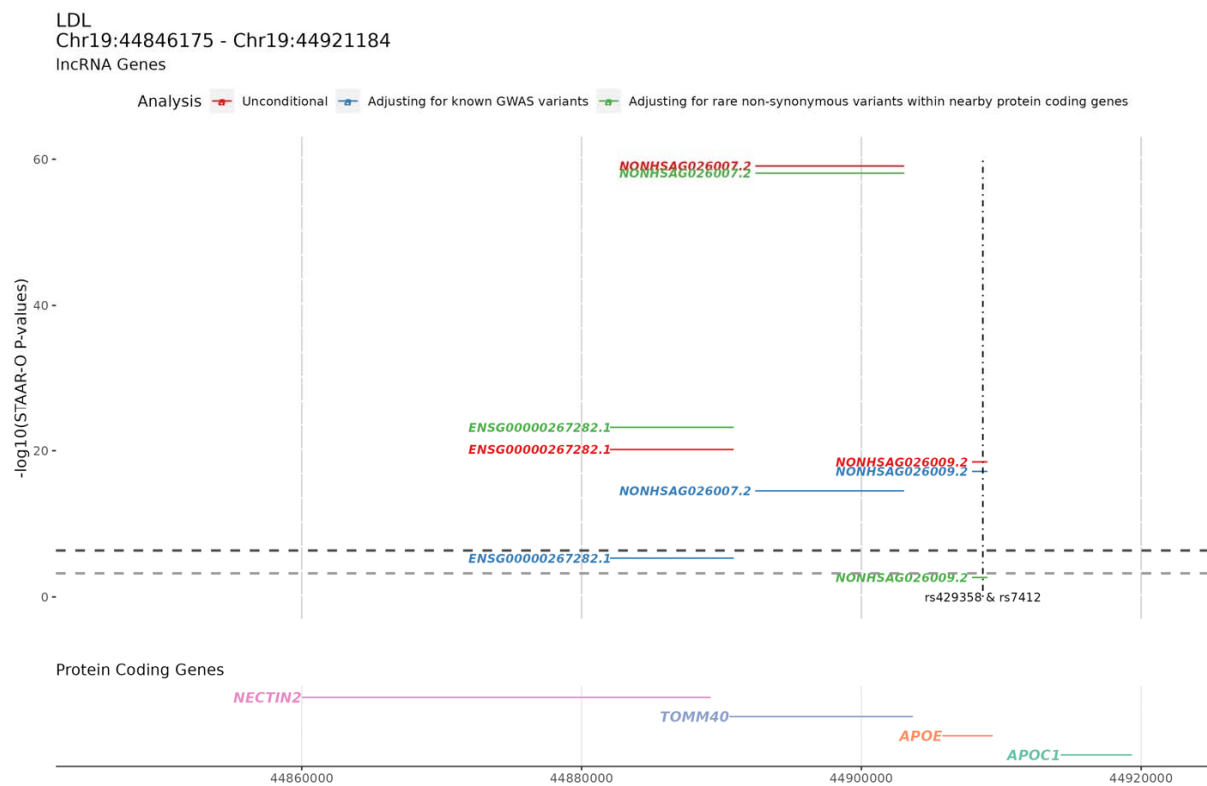

300

## 301 **Discussion**

302 In this study, we conducted genome-wide rare-variant associations of 165K lncRNAs in  
303 ancestrally diverse TOPMed participants ( $N = 66,329$ ) with measured blood lipid levels. Using  
304 rare-variant association tests, we observed 83 rare lncRNAs significantly associated with blood  
305 lipid levels, and of these, 61 (73%) were conditionally distinct from common regulatory  
306 variation and rare protein coding variation at the same loci. Notably, most of these association  
307 signals were replicated in an independent WGS dataset, UK Biobank. We also highlighted one  
308 trait-associated lncRNA, ENSG00000267282.1(chr19:44,881,088-44,890,922), whose gene  
309 expression level was also shown to be associated with lipid levels using RNA-seq data from the  
310 FHS. Together, this systematic assessment of rare lncRNA variants suggests an additional  
311 genomic element in known lipid gene regions that is distinct from the known lipid genes.

312  
313 Genetic variation for blood lipids levels has been observed across the allelic spectrum with  
314 common, rare coding, and rare non-coding variants being associated with blood lipids levels<sup>36</sup>.  
315 Blood lipids have been associated with non-coding regulatory variants and coding variation in  
316 genes, and now also associated with lncRNAs. We show that all the trait-associated lncRNAs are  
317 in genomic regions previously associated with blood lipid traits, leading to the plausibility of  
318 these results. About 75% of the associations are conditionally distinct from common regulatory  
319 variation and rare protein coding variation at the same loci previously identified through GWAS  
320 and whole exome sequencing studies. This indicates that the regulatory variants through  
321 lncRNAs additionally contribute to the variation of blood lipid levels.

322

323

324 Despite numerous reports indicating the potential regulatory role of long non-coding RNAs  
325 (lncRNAs), only a small proportion of them have substantial evidence to support such  
326 claims<sup>25,26,45</sup>. The fraction of lncRNAs that are functional remains unknown. Through a  
327 comprehensive study of over 165,000 lncRNAs, we found that the majority of lncRNAs are not  
328 associated with a lipid trait, which aligns with the argument made previously that only a few  
329 human lncRNAs contribute centrally to human physiology<sup>45</sup>. However, there are still some  
330 lncRNAs that harbor variants that predispose individuals to phenotypic differences in blood lipid  
331 levels. Our results suggest that investigators should first prioritize individual lncRNAs near the  
332 known trait-associated loci for analysis, which is more likely to yield robust experimental  
333 observations.

334  
335 We further investigated one lncRNA, liver-expressed liver X receptor-induced sequence (*LeXis*),  
336 which is a mediator of the complex effects of liver X receptor (LXR) signaling on hepatic lipid  
337 metabolism to maintain hepatic sterol content and serum cholesterol levels<sup>46,47</sup>. A potential  
338 orthologue of *LeXis* in humans, TCONS\_00016452 (chr9:104,990,086-104,991,780), is found in  
339 a region adjacent to the human *ABCA1* gene. It didn't stand out as a significant signal for any  
340 lipid trait in our study, which might suggest that it was not a functional orthologue of *LeXis*.  
341 However, the rapid evolutionary turnover of lncRNAs still hinders the functional identification  
342 between species<sup>45,47</sup>.

343  
344 Several limitations of our study should be noted. First, our RNA-seq analyses were restricted to  
345 GENCODE annotation. The small proportion of overlapping RNA-seq data and WGS data limits  
346 the ability to test rare lncRNA variants with their gene expression. Second, we did not correct for

347 the number of tested lipid traits however, there is a moderate to high correlation among the blood  
348 lipid levels and therefore this would lead to over correction. Third, to assess a causal role of the  
349 rare lncRNA variants, we need to further show that they are correlated with lncRNA expression  
350 but not correlated with altered expression or function of other genes nearby.

351  
352 In summary, our results from a large ancestrally diverse participants add further evidence that  
353 lncRNA is an additional genomic element in known lipid gene regions that is distinct from the  
354 known genes. We comprehensively evaluated 165K lncRNAs for their association with variation  
355 in lipid traits and replicated most of the signals in an independent UKB WGS cohort.

356

357

358

359

360

361

362

363

364

365

366

367

368

369

## 370 **Methods**

### 371 *Discovery and replication cohorts*

372 **Discovery cohorts.** The discovery cohort included 66,329 participants in the NHLBI Trans-  
373 Omics for Precision Medicine (TOPMed) from 21 cohort studies with Freeze 8 whole genome  
374 sequencing (WGS) and blood lipid levels available: Old Order Amish (Amish; n=1083),  
375 Atherosclerosis Risk in Communities study (ARIC; n=8016), Mt Sinai BioMe Biobank  
376 (BioMe; n=9848), Coronary Artery Risk Development in Young Adults (CARDIA;  
377 n=3,056), Cleveland Family Study (CFS; n=579), Cardiovascular Health Study (CHS;  
378 n=3,456), Diabetes Heart Study (DHS; n=365), Framingham Heart Study (FHS;  
379 n=3992), Genetic Studies of Atherosclerosis Risk (GeneSTAR; n=1757), Genetic  
380 Epidemiology Network of Arteriopathy (GENOA; n=1046), Genetic Epidemiology Network  
381 of Salt Sensitivity (GenSalt; n=1772), Genetics of Lipid-Lowering Drugs and Diet Network  
382 (GOLDN; n=926), Hispanic Community Health Study - Study of Latinos (HCHS-SOL;  
383 n=7714), Hypertension Genetic Epidemiology Network and Genetic Epidemiology Network  
384 of Arteriopathy (HyperGEN; n=1853), Jackson Heart Study (JHS; n=2847), Multi-Ethnic  
385 Study of Atherosclerosis (MESA; n=5290), Massachusetts General Hospital Atrial  
386 Fibrillation Study (MGH\_AF; n=683), San Antonio Family Study (SAFS; n=619),  
387 Samoan Adiposity Study (Samoan; n=1182), Taiwan Study of Hypertension using Rare  
388 Variants (THR.V; n=1982) and Women's Health Initiative (WHI; n=8263). The  
389 discovery cohorts consisted of 29,502 (44.5%) White, 16,983 (25.6%) Black, 13,943 (21.0%)  
390 Hispanic, 4719 (7.1%) Asian, and 1182 (1.8%) Samoan. More information for study descriptions  
391 can be found in **Supplementary Table 1**.

392 **Replication cohorts.** We sought to replicate the findings using the UK Biobank WGS data for  
393 139,849 genomes with blood lipid traits<sup>40</sup>. The UK Biobank is a large, population-based  
394 prospective cohort of half a million United Kingdom residents aged 40–69 years. The replication  
395 cohorts consisted of 116,335 White, and 23,335 others (**Supplementary Table 3**).

396 **Ethical regulations.** Participants from each of the studies contributing to the NHLBI TOPMed  
397 consortium provided informed consent, and all studies were approved by IRBs in each of the  
398 participating institutions.

399

#### 400 *TOPMed WGS Freeze 8 data*

401 **Phenotype data.** We included four conventionally measured blood lipids in this study: low-  
402 density lipoprotein cholesterol (LDL-C), total cholesterol (TC), triglyceride (TG), high-density  
403 lipoprotein cholesterol (HDL-C). Detailed phenotype calculation and harmonization were  
404 described elsewhere<sup>36</sup>. Briefly, LDL-C was either directly measured or calculated by the  
405 Friedewald equation when triglycerides were  $<400$  mg/dL. We adjusted the total cholesterol by  
406 dividing by 0.8 and LDL-C by dividing by 0.7 when statins were present<sup>10,35</sup>. For triglycerides,  
407 we additionally performed the natural log transformation for analysis, since triglycerides were  
408 skewed. We then fitted a linear regression model for each phenotype to get the residuals after  
409 adjusting for age, age<sup>2</sup>, sex, race/ethnicity, study and the first 11 ancestral PCs (as recommended  
410 by the TOPMed DCC). For Amish participants, we additionally adjusted for APOB  
411 p.Arg3527Gln in LDL-C and TC, and adjusted for APOC3 p.Arg19Ter in HDL-C and TG<sup>48–50</sup>.  
412 The residuals were inverse rank normalized and rescaled by the standard deviation of the original  
413 phenotype within each group<sup>36</sup>.

414 **Genotype data.** Whole genome sequencing data were accessed from the TOPMed Freeze 8  
415 release. DNA samples were sequenced at the >30× target coverage at seven centers (Broad  
416 Institute of MIT and Harvard, Northwest Genomics Center, New York Genome Center, Illumina  
417 Genomic Services, PSOMAGEN [formerly Macrogen], Baylor College of Medicine Human  
418 Genome Sequencing Center, and McDonnell Genome Institute [MGI] at Washington  
419 University)<sup>34</sup>. The reads were aligned to human genome build GRCh38 using the BWA-MEM  
420 algorithm. The genotype calling was performed using the TOPMed variant calling pipeline  
421 ([https://github.com/statgen/topmed\\_variant\\_calling](https://github.com/statgen/topmed_variant_calling)). The resulting BCF files were converted to  
422 SeqArray GDS format and annotated were annotated internally by curating data from multiple  
423 database sources using Functional Annotation of Variant–Online Resource (FAVOR  
424 (<http://favor.genohub.org>)<sup>37,39</sup>). The resulting annotated GDS (aGDS) files were used in this  
425 study. We computed the genetic relationship matrix (GRM) using R package *PC-relate* and  
426 subtracted GRM of those samples with lipid phenotypes using R package *GENESIS*.

427

#### 428 *Human reference genome annotations for long non-coding RNA genes*

429 Multiple lncRNA annotations are available. We obtained four long non-coding RNAs  
430 (lncRNAs) annotation resources with different qualities and sizes and merged them to improve  
431 comprehensiveness. They included GENCODE<sup>29,30</sup>, FANTOM5 CAT<sup>31</sup>, NONCODE<sup>32</sup> and  
432 lncRNAKB<sup>33</sup>.

433 **GENCODE.** GENCODE is the default human reference genome annotation for both Ensembl  
434 and UCSC genome browsers. It is also widely adopted by many large-scale genomic consortiums  
435 including TOPMed. GENCODE gene sets cover lncRNAs, pseudogenes and small RNAs in  
436 addition to protein-coding genes. The lncRNA annotation in GENCODE is almost entirely

437 manual, which ensures the quality and consistency of the data. We downloaded the GENCODE  
438 v38 (December 2020) human release from  
439 [https://ftp.ebi.ac.uk/pub/databases/gencode/Gencode\\_human/release\\_38/gencode.v38.long\\_non](https://ftp.ebi.ac.uk/pub/databases/gencode/Gencode_human/release_38/gencode.v38.long_noncoding_RNAs.gtf.gz)  
440 [oding\\_RNAs.gtf.gz](https://ftp.ebi.ac.uk/pub/databases/gencode/Gencode_human/release_38/gencode.v38.long_noncoding_RNAs.gtf.gz), and kept 17,944 lncRNAs genes with a stable identifier and the genomic  
441 location information.

442 **FANTOM CAT.** The Functional Annotation of the Mammalian genome (FANTOM) CAGE-  
443 associated transcriptome (CAT) meta-assembly combines both published sources and in-house  
444 short-read assemblies. It utilized CAGE tags, which mark transcription start sites (TSSs), to  
445 identify human lncRNA genes with high-confidence 5' ends. We acquired the FANTOM CAT  
446 (lv3 robust) lncRNAs assembly from  
447 [https://fantom.gsc.riken.jp/5/suppl/Hon\\_et\\_al\\_2016/data/assembly/lv3\\_robust/FANTOM\\_CAT.l](https://fantom.gsc.riken.jp/5/suppl/Hon_et_al_2016/data/assembly/lv3_robust/FANTOM_CAT.lv3_robust.only_lncRNA.gtf.gz)  
448 [v3\\_robust.only\\_lncRNA.gtf.gz](https://fantom.gsc.riken.jp/5/suppl/Hon_et_al_2016/data/assembly/lv3_robust/FANTOM_CAT.lv3_robust.only_lncRNA.gtf.gz). Since the FANTOM5 annotations were on genome version hg19  
449 (GRCh37), we lifted over to genome version hg38 (GRCh38) using the UCSC liftOver tool<sup>51</sup>.

450 **lncRNAKB.** Long non-coding RNA Knowledgebase (lncRNAKB) is an integrated resource for  
451 exploring lncRNA biology in the context of tissue-specificity and disease association. A  
452 systematic integration of annotations using a cumulative stepwise intersection method from six  
453 independent databases resulted in 77,199 human lncRNA. We downloaded the lncRNAKB v7  
454 from <http://lncnakb.org>.

455 **NONCODE.** NONCODE database integrated annotations from both literature searches and  
456 other public databases. The latest version, NONCODE version 6, is the single largest collection  
457 of lncRNAs, describing 96,422 lncRNA genes in humans. Each lncRNA gene in the NONCODE  
458 database had been assigned a unique NONCODE ID. We download the whole NONCODE v6



459 human data from

460 [http://www.noncode.org/datadownload/NONCODEv6\\_hg38.lncAndGene.bed.gz](http://www.noncode.org/datadownload/NONCODEv6_hg38.lncAndGene.bed.gz).

461 **Integration across the lncRNA annotations.** We kept only those lncRNA genes ranging in  
462 length from 200 nucleotides (nt) to 5 kilobases (kb). We limited the maximum length of a  
463 lncRNA gene to 5kb to control for the computational complexity<sup>52</sup>. Overlapping lncRNA genes  
464 between FANTOM and GENCODE using the Ensembl stable identifier were removed. We split  
465 each annotation file into individual files by chromosome with the start and end coordinates of the  
466 lncRNA genes. All duplicated lncRNAs between annotation files were removed by checking  
467 whether they have the same start and end coordinates. We then used the following intersection  
468 order based on experimental validation to merge the four lncRNA annotations: 1. GENCODE, 2.  
469 FANTOM5 CAT, 3. NONCODE and 4. lncRNAKB. Approximately 165k lncRNA genes were  
470 left for further analysis.

471

472 *LncRNA rare variant association test*

473 **lncRNA rare variant sets.** We obtained the start and end genomic coordinates (human genome  
474 build GRCh38) of the lncRNA genomic regions from our previously curated lncRNA gene list.  
475 We then defined aggregation units by using all the rare variants (MAF <0.01) based on their  
476 genomic locations with respect to the start and end genomic coordinates of the lncRNA genes.  
477 We removed lncRNA rare variant sets that had less than two rare variants. For sensitivity  
478 analysis, we only aggregated exonic and splicing variants in lncRNA genes provided by  
479 GENCODE v29, for which is the default genome annotation employed by TOPMed  
480 consortium<sup>34</sup>.

481 **STAAR unconditional analysis.** We applied the STAAR (variant-set test for association using  
482 annotation information) framework to identify rare variants in the lncRNA variant sets that are  
483 associated with four quantitative lipid traits (LDL-C, HDL-C, TG and TC). STAAR is a scalable  
484 and powerful variant-set test that uses an omnibus multi-dimensional weighting scheme to  
485 incorporate both qualitative functional categories and multiple in silico variant annotation scores  
486 for genetic variants. STAAR accounts for population structure and relatedness and is scalable for  
487 analyzing large WGS studies of continuous and dichotomous traits by fitting linear and logistic  
488 mixed models<sup>37,38</sup>. To perform the STAAR unconditional analysis, we first fitted a STAAR null  
489 model using *fit\_null\_glmkin()* function to account for sample relatedness with phenotypic data,  
490 covariates and (sparse) genetic relatedness matrix as input. For each of the four lipid phenotypes,  
491 we adjusted for age, age2, sex, study and PC1-PC11. We calculated the *P* value for each lncRNA  
492 rare variant set using STAAR-O, an omnibus test in the STAAR framework that combines *P*  
493 values from multiple annotation-weighted burden tests, SKAT and ACAT-V using the ACAT  
494 method. A total of 13 aggregated variant functional annotations were incorporated in STAAR-O,  
495 including three integrative scores (CADD<sup>53</sup>, LINSIGHT<sup>54</sup> and FATHMM-XF<sup>55</sup>) and 10  
496 annotation principal components (aPCs) (**Supplementary Table 5**)<sup>38</sup>. All analyses were  
497 performed using R packages *STAAR* (version 0.9.6) and *STAARpipeline* (version 0.9.6).

498 **STAAR conditional analysis adjusting for known GLGC GWAS variants.** We performed  
499 conditional analysis to identify lncRNA rare variant association independent of known lipid-  
500 associated variants. We obtained a list of 1,750 significant index variants (**Supplementary**  
501 **Table 6**) associated with one or more lipid levels from The Global Lipids Genetics Consortium  
502 (GLGC) latest lipid GWAS results<sup>18,19,56</sup>. The positions of SNV were lifted over to genome build  
503 38. We adjusted for known lipid variants in a  $\pm 500$  kb window beyond a variant set.

504 **STAAR rare variant association test adjusting for nearby protein coding genes.** The  
505 unconditional analysis showed that most lncRNA genes associated with lipids are near known  
506 monogenic lipid genes. We sought to perform conditional analyses adjusting lncRNA rare  
507 variant sets for nearby protein coding genes. The adjusted nearby protein coding genes can be  
508 divided into two categories: the closest protein coding genes and those nearby known lipid  
509 monogenic genes, including *ANGPTL8*, *APOA1*, *APOA5*, *APOB*, *APOC1*, *APOC3*, *APOE*,  
510 *CETP*, *LDLR*, *LPA*, *LPL*, *PCSK7*, *PCSK9*, *PLA2G15*, *TM6SF2*<sup>19</sup>. Our primary analysis was to  
511 adjust for only rare nonsynonymous variants (MAF < 1%) within nearby protein coding genes.  
512 We did two sensitivity analyses, one adjusted for rare synonymous variants (MAF < 1%) within  
513 nearby protein coding genes, and another adjusted for rare predicted loss-of-function (pLoF)  
514 variants (MAF < 1%) within nearby protein coding genes. For each participant, we created three  
515 burden scores separately by combining the minor allele counts of nonsynonymous, synonymous,  
516 and pLoF variants with a MAF < 1% carried within the closest gene and the nearby lipid  
517 monogenic genes in a 250kb window. We re-fitted null models similar to the unconditional  
518 analysis and added all the burden scores of the closest gene and the nearby lipid monogenic  
519 genes (if any) as additional covariates for each lipid phenotype. We then repeated the STAAR  
520 procedures to calculate the STAAR-O *P* values after adjusting for rare nonsynonymous, rare  
521 synonymous, and rare pLoF variants.

522 **Effective number of independent tests.** Although we removed redundant lncRNAs, the  
523 remaining lncRNAs can still have overlapping regions across different genome annotations.  
524 Therefore, we adopted a principal component analysis (PCA) based approach, the simple*M*  
525 method to calculate the effective number of independent tests<sup>42</sup>. For each chromosome, suppose  
526 we had tested *K* lncRNA rare variant set (*lncRNA*<sub>1</sub>, *lncRNA*<sub>2</sub>, ..., *lncRNA*<sub>*K*</sub>) for *N* individuals

527 (1, 2, ..., N), we first found the minor allele counts of rare variants (MAF < 1%) carried by each  
528 individual within each lncRNA rare variant set that were tested by STAAR and constructed a  
529  $N \times K$  matrix. We then derived the pairwise lncRNA correlation matrix  $R_{K \times K}$  that reflected the  
530 correlation structure among the tests from the constructed  $N \times K$  matrix. We calculated the  
531 eigenvalues,  $\{\lambda_i: \lambda_1 \geq \lambda_2 \geq \dots \geq \lambda_K\}$ , from the pairwise lncRNA correlation matrix  $R_{K \times K}$ . The  
532 effective number of tests ( $M_{eff}$ ) for each chromosome was estimated as

533  $M_{eff} = \min(x) \text{ s.t. } \frac{\sum_{i=1}^x \lambda_i}{\sum_{i=1}^K \lambda_i} > c$ , where  $c$  was a pre-defined parameter which was set to 0.95. We

534 added up the effective number of tests ( $M_{eff}$ ) by each chromosome assuming independence  
535 between chromosomes. The Bonferroni correction formula was then used to calculate the  
536 adjusted significance level as  $0.05/M_{eff}$  as used for unconditional analysis.

537

### 538 *LncRNA gene expression analysis*

539 **Framingham Heart Study (FHS) RNA-seq data.** We utilized FHS RNA sequencing data to  
540 perform the association analyses of lncRNA expression levels with blood lipid traits. This study  
541 included 1505 participants from the FHS Third Generation cohort<sup>41</sup>. Blood samples for RNA seq  
542 were collected from Third Generation participants who attended the second examination cycle  
543 (2008–2011). Protocols for participant examinations and collection of genetic materials were  
544 approved by the Institutional Review Board at Boston Medical Center. All participants provided  
545 written, informed consent for genetic studies. All research was performed in accordance with  
546 relevant guidelines/regulations. The technical details for the blood draw and RNA sequencing  
547 can be found elsewhere<sup>43</sup>. For the association analyses (**Supplementary Text**), we first  
548 processed the RNASeq Data with following steps: 1. Sample QC by removing misidentified  
549 samples and sentinel control samples. 2. TMM normalization for the gene-level count data. 3.

550 Filtering low expression transcripts. 4. Regressing the  $\log_2(\text{TMM}+1)$  on the technical covariates,  
551 and the resultant residuals were used to perform association analysis. We fitted a linear mixed  
552 effects model for the residuals of the TMM normalized  $\log_2$  transformed counts data and the  
553 lipid phenotypes adjusting for predicted complete blood count (CBC), constructed surrogate  
554 variables (SVs), sex, age, and family structure as variance-covariance matrix.

## 555 **Genome build**

556 All genome coordinates are given in the NCBI GRCh38/UCSC hg38 version of the human  
557 genome.

558

## 559 **Acknowledgements**

560 Whole genome sequencing (WGS) for the Trans-Omics in Precision Medicine (TOPMed)  
561 program was supported by the National Heart, Lung and Blood Institute (NHLBI). G.M.P. is  
562 supported by NIH grants R01HL142711 and R01HL127564. P.N. is supported by grants from  
563 the National Heart, Lung, and Blood Institute (R01HL142711, R01HL148050, R01HL151283,  
564 R01HL148565, R01HL135242, R01HL151152), Fondation Leducq (TNE-18CVD04), and  
565 Massachusetts General Hospital (Paul and Phyllis Fireman Endowed Chair in Vascular  
566 Medicine). X.Lin is supported by grants R35-CA197449, U19-CA203654, R01-HL113338, and  
567 U01-HG009088. We like to acknowledge all the grants that supported this study, R01  
568 HL121007, U01 HL072515, R01 AG18728, X01HL134588, HL 046389, HL113338, and  
569 1R35HL135818, K01 HL135405, R03 HL154284, U01HL072507, R01HL087263,  
570 R01HL090682, P01HL045522, R01MH078143, R01MH078111, R01MH083824,  
571 U01DK085524, R01HL113323, R01HL093093, R01HL140570, R01HL142711, R01HL127564,  
572 R01HL148050, R01HL148565, HL105756, and Leducq TNE-18CVD04. The views expressed

573 in this manuscript are those of the authors and do not necessarily represent the views of the  
574 National Heart, Lung, and Blood Institute; the National Institutes of Health; or the U.S.  
575 Department of Health and Human Services. We gratefully acknowledge the studies and  
576 participants who provided biological samples and data for TOPMed and UK Biobank. The full  
577 study specific acknowledgements and NHLBI TOPMed Fellowship acknowledgement are  
578 detailed in **Supplementary Text**.

579

### 580 **Author contributions**

581 Y.W., P.N., and G.M.P. designed the study. Y.W. carried out all the primary analysis with  
582 critical inputs from P.N. and G.M.P. M.S.S carried out the replication analysis. Y.W. and J.A.H  
583 carried out the secondary analysis. Y.W., M.S.S., X.Li, Z.L., A.K.D, J.C.B., J.B., E.B., D.W.B.,  
584 B.E.C., J.C.C., A.P.C., Y.C., J.E.C., P.S.D., S.K.D., P.T.E., J.S.F., M.F., B.I.F., S. Gabriel,  
585 S.Germer, R.A.G., X.G., J.H., N.H., B.H., L.H., M.R.I., R.J., R.C.K., S.LR.K., T.N.K., R.K.,  
586 C.K., B.G.K., D.Levy, C.Li, C.Liu, D.Lloyd-Jone, R.JF.L., M.C.M., L.W.M., R.A.M., R.L.M.,  
587 B.D.M., M.E.M., A.C.M., J.M.M., T.N., J.R.O., N.D.P., M.H.P., B.M.P., L.M.E., D.C.R., S.R.,  
588 A.P.R., S.S.R., M.R., W.H-H.S., J.A.S., A.S., H.K.T., M.Y.T., K.A.V., Z.W., L.R.Y., W.Z.,  
589 J.I.R., X.Lin., P.N., and G.M.P. acquired, analyzed or interpreted data. G.M.P. and P.N. and  
590 NHLBI TOPMed Lipids Working Group provided administrative, technical, or material support.  
591 Y.W. and G.M.P. wrote the first draft of the manuscript and revised it according to suggestions  
592 by the coauthors. All authors critically reviewed the manuscript, suggested revisions as needed  
593 and approved the final version.

594

### 595 **Declaration of interests**

596 P.N. reports investigator-initiated grant support from Amgen, Apple, AstraZeneca, and Boston  
597 Scientific, personal fees from Apple, AstraZeneca, Blackstone Life Sciences, Foresite Labs,  
598 Genentech, TenSixteen Bio, and Novartis, scientific advisory board membership of geneXwell  
599 and TenSixteen Bio, and spousal employment at Vertex, all unrelated to the present work.  
600 B.M.P. serves on the Steering Committee of the Yale Open Data Access Project funded by  
601 Johnson & Johnson. L.M.R is a consultant for the TOPMed Administrative Coordinating Center  
602 (through Westat). M.E.M. receives funding from Regeneron Pharmaceutical Inc. unrelated to this  
603 work. X. Lin is a consultant of AbbVie Pharmaceuticals and Verily Life Sciences. The remaining  
604 authors declare no competing interests.

## 605 **Data availability**

606 Individual whole-genome sequence data for TOPMed and harmonized lipids at individual  
607 sample level are available through restricted access via the TOPMed dbGaP Exchange area.  
608 Summary level genotype data from TOPMed are available through the BRAVO browser  
609 (<https://bravo.sph.umich.edu/>). The UK Biobank (UKB) whole-genome sequence data can be  
610 accessed through UKB Research Analysis Platform (RAP), through the UKB approval system  
611 (<https://www.ukbiobank.ac.uk>). The dbGaP accessions for TOPMed cohorts are as follows: Old  
612 Order Amish (Amish) *phs000956 and phs00039*; Atherosclerosis Risk in Communities study  
613 (ARIC) *phs001211 and phs000280*; Mt Sinai BioMe Biobank (BioMe) *phs001644 and*  
614 *phs000925*; Coronary Artery Risk Development in Young Adults (CARDIA) *phs001612 and*  
615 *phs000285*; Cleveland Family Study (CFS) *phs000954 and phs000284*; Cardiovascular Health  
616 Study (CHS) *phs001368 and phs000287*; Diabetes Heart Study (DHS) *phs001412 and*  
617 *phs001012*; Framingham Heart Study (FHS) *phs000974 and phs000007*; Genetic Studies of  
618 Atherosclerosis Risk (GeneSTAR) *phs001218 and phs000375*; Genetic Epidemiology Network

619 of Arteriopathy (GENOA) *phs001345 and phs001238*; Genetic Epidemiology Network of Salt  
620 Sensitivity (GenSalt) *phs001217 and phs000784*; Genetics of Lipid-Lowering Drugs and Diet  
621 Network (GOLDN) *phs001359 and phs000741*; Hispanic Community Health Study - Study of  
622 Latinos (HCHS\_SOL) *phs001395 and phs000810*; Hypertension Genetic Epidemiology Network  
623 and Genetic Epidemiology Network of Arteriopathy (HyperGEN) *phs001293 and*  
624 *phs001293*; Jackson Heart Study (JHS) *phs000964 and phs000286*; Multi-Ethnic Study of  
625 Atherosclerosis (MESA) *phs001416 and phs000209*; Massachusetts General Hospital Atrial  
626 Fibrillation Study (MGH\_AF) *phs001062 and phs001001*; San Antonio Family Study  
627 (SAFS) *phs001215 and phs000462*; Samoan Adiposity Study (SAS) *phs000972 and*  
628 *phs000914*; Taiwan Study of Hypertension using Rare Variants (THRV) *phs001387 and*  
629 *phs001387*; Women's Health Initiative (WHI) *phs001237 and phs000200*.

630

### 631 **Code availability**

632 R code for implementing the analysis is available at the public GitHub Repository  
633 <https://github.com/kyleyxw/lncRNA-paper>. STAAR is implemented as an open-source R  
634 package available at <https://github.com/xihaoli/STAAR>. STAARpipeline is implemented as an  
635 open-source R package available at <https://github.com/xihaoli/STAARpipeline>.

636

637

638

639

640



641

642

643

644

## References

1. Saxena, R. *et al.* Genome-wide association analysis identifies loci for type 2 diabetes and triglyceride levels. *Science (1979)* **316**, 1331–1336 (2007).
2. Kathiresan, S. *et al.* A genome-wide association study for blood lipid phenotypes in the Framingham Heart Study. *BMC Med Genet* **8**, 1–10 (2007).
3. Kathiresan, S. *et al.* Polymorphisms Associated with Cholesterol and Risk of Cardiovascular Events. *New England Journal of Medicine* **358**, 1240–1249 (2008).
4. Teslovich, T. M. *et al.* Biological, clinical and population relevance of 95 loci for blood lipids. *Nature* **466**:7307 **466**, 707–713 (2010).
5. Asselbergs, F. W. *et al.* Large-scale gene-centric meta-analysis across 32 studies identifies multiple lipid loci. *Am J Hum Genet* **91**, 823–838 (2012).
6. Albrechtsen, A. *et al.* Exome sequencing-driven discovery of coding polymorphisms associated with common metabolic phenotypes. *Diabetologia* **56**, 298–310 (2013).
7. Tachmazidou, I. *et al.* A rare functional cardioprotective APOC3 variant has risen in frequency in distinct population isolates. *Nature Communications* **2013 4:1** **4**, 1–6 (2013).
8. Willer, C. J. *et al.* Discovery and refinement of loci associated with lipid levels. *Nature Genetics* **2013 45:11** **45**, 1274–1283 (2013).
9. Holmen, O. L. *et al.* Systematic evaluation of coding variation identifies a candidate causal variant in TM6SF2 influencing total cholesterol and myocardial infarction risk. *Nature Genetics* **2014 46:4** **46**, 345–351 (2014).
10. Peloso, G. M. *et al.* Association of low-frequency and rare coding-sequence variants with blood lipids and coronary heart disease in 56,000 whites and blacks. *Am J Hum Genet* **94**, 223–232 (2014).
11. Surakka, I. *et al.* The impact of low-frequency and rare variants on lipid levels. *Nature Genetics* **2015 47:6** **47**, 589–597 (2015).
12. Tang, C. S. *et al.* Exome-wide association analysis reveals novel coding sequence variants associated with lipid traits in Chinese. *Nature Communications* **2015 6:1** **6**, 1–9 (2015).
13. Liu, D. J. *et al.* Exome-wide association study of plasma lipids in >300,000 individuals. *Nature Genetics* **2017 49:12** **49**, 1758–1766 (2017).
14. Lu, X. *et al.* Exome chip meta-analysis identifies novel loci and East Asian-specific coding variants that contribute to lipid levels and coronary artery disease. *Nature Genetics* **2017 49:12** **49**, 1722–1730 (2017).
15. Hoffmann, T. J. *et al.* A large electronic-health-record-based genome-wide study of serum lipids. *Nature Genetics* **2018 50:3** **50**, 401–413 (2018).
16. Klarin, D. *et al.* Genetics of blood lipids among ~300,000 multi-ethnic participants of the Million Veteran Program. *Nature Genetics* **2018 50:11** **50**, 1514–1523 (2018).
17. Spracklen, C. N. *et al.* Association analyses of East Asian individuals and trans-ancestry analyses with European individuals reveal new loci associated with cholesterol and triglyceride levels. *Hum Mol Genet* **27**, 1122–1122 (2018).
18. Graham, S. E. *et al.* The power of genetic diversity in genome-wide association studies of lipids. *Nature* **600**, 675–679 (2021).
19. Kanoni, S. *et al.* Implicating genes, pleiotropy, and sexual dimorphism at blood lipid loci through multi-ancestry meta-analysis. *Genome Biol* **23**, 268 (2022).

20. Grundy, S. M. *et al.* 2018  
AHA/ACC/AACVPR/AAPA/ABC/ACPM/ADA/AGS/APhA/ASPC/NLA/PCNA Guideline on the Management of Blood Cholesterol: A Report of the American College of Cardiology/American Heart Association Task Force on Clinical Practice Guidelines. *Circulation* **139**, E1082–E1143 (2019).
21. Musunuru, K. *et al.* Exome Sequencing, ANGPTL3 Mutations, and Familial Combined Hypolipidemia. *New England Journal of Medicine* **363**, 2220–2227 (2010).
22. Cohen, J. C., Boerwinkle, E., Mosley, T. H. Jr. & Hobbs, H. H. Sequence Variations in PCSK9, Low LDL, and Protection against Coronary Heart Disease. <https://doi.org/10.1056/NEJMoa054013> **354**, 1264–1272 (2006).
23. Kathiresan, S. A PCSK9 Missense Variant Associated with a Reduced Risk of Early-Onset Myocardial Infarction. <https://doi.org/10.1056/NEJMc0707445> **358**, 2299–2300 (2008).
24. Uszczyńska-Ratajczak, B., Lagarde, J., Frankish, A., Guigó, R. & Johnson, R. Towards a complete map of the human long non-coding RNA transcriptome. *Nature Reviews Genetics* vol. 19 535–548 Preprint at <https://doi.org/10.1038/s41576-018-0017-y> (2018).
25. Van Solingen, C., Scacalossi, K. R. & Moore, K. J. Long noncoding RNAs in lipid metabolism. *Curr Opin Lipidol* **29**, 224 (2018).
26. Muret, K. *et al.* Long noncoding RNAs in lipid metabolism: literature review and conservation analysis across species. *BMC Genomics* 2019 20:1 **20**, 1–18 (2019).
27. Statello, L., Guo, C. J., Chen, L. L. & Huarte, M. Gene regulation by long non-coding RNAs and its biological functions. *Nature Reviews Molecular Cell Biology* 2020 22:2 **22**, 96–118 (2020).
28. Bocher, O. & Génin, E. Rare variant association testing in the non-coding genome. *Human Genetics* vol. 139 1345–1362 Preprint at <https://doi.org/10.1007/s00439-020-02190-y> (2020).
29. Harrow, J. *et al.* GENCODE: The reference human genome annotation for the ENCODE project. *Genome Res* **22**, 1760–1774 (2012).
30. Frankish, A. *et al.* GENCODE 2021. *Nucleic Acids Res* **49**, D916–D923 (2021).
31. Hon, C. C. *et al.* An atlas of human long non-coding RNAs with accurate 5' ends. *Nature* **543**, 199–204 (2017).
32. Zhao, L. *et al.* NONCODEV6: An updated database dedicated to long non-coding RNA annotation in both animals and plants. *Nucleic Acids Res* **49**, D165–D171 (2021).
33. Seifuddin, F. *et al.* lncRNAKB, a knowledgebase of tissue-specific functional annotation and trait association of long noncoding RNA. *Sci Data* **7**, (2020).
34. Taliun, D. *et al.* Sequencing of 53,831 diverse genomes from the NHLBI TOPMed Program. *Nature* **590**, 290–299 (2021).
35. Natarajan, P. *et al.* Deep-coverage whole genome sequences and blood lipids among 16,324 individuals. *Nat Commun* **9**, (2018).
36. Selvaraj, M. S. *et al.* Whole genome sequence analysis of blood lipid levels in >66,000 individuals. *Nature Communications* 2022 13:1 **13**, 1–18 (2022).
37. Li, X. *et al.* Dynamic incorporation of multiple in silico functional annotations empowers rare variant association analysis of large whole-genome sequencing studies at scale. *Nat Genet* **52**, 969–983 (2020).
38. Li, Z. *et al.* A framework for detecting noncoding rare-variant associations of large-scale whole-genome sequencing studies. *Nat Methods* **19**, 1599–1611 (2022).

39. Zhou, H. *et al.* FAVOR: functional annotation of variants online resource and annotator for variation across the human genome. *Nucleic Acids Res* (2022) doi:10.1093/nar/gkac966.
40. Halldorsson, B. V. *et al.* The sequences of 150,119 genomes in the UK Biobank. *Nature* **607**, 732–740 (2022).
41. Splansky, G. L. *et al.* The Third Generation Cohort of the National Heart, Lung, and Blood Institute's Framingham Heart Study: design, recruitment, and initial examination. *Am J Epidemiol* **165**, 1328–1335 (2007).
42. Gao, X., Starmer, J. & Martin, E. R. A multiple testing correction method for genetic association studies using correlated single nucleotide polymorphisms. *Genet Epidemiol* **32**, 361–369 (2008).
43. Liu, C. *et al.* Whole genome DNA and RNA sequencing of whole blood elucidates the genetic architecture of gene expression underlying a wide range of diseases. *Sci Rep* **12**, 20167 (2022).
44. Rossignoli, A. *et al.* Poliovirus Receptor-Related 2: A Cholesterol-Responsive Gene Affecting Atherosclerosis Development by Modulating Leukocyte Migration. *Arterioscler Thromb Vasc Biol* **37**, 534–542 (2017).
45. Ponting, C. P. & Haerty, W. Genome-Wide Analysis of Human Long Noncoding RNAs: A Provocative Review. (2022) doi:10.1146/annurev-genom-112921.
46. Tontonoz, P. *et al.* Long noncoding RNA facilitated gene therapy reduces atherosclerosis in a murine model of familial hypercholesterolemia. *Circulation* vol. 136 776–778 Preprint at <https://doi.org/10.1161/CIRCULATIONAHA.117.029002> (2017).
47. Sallam, T. *et al.* Feedback modulation of cholesterol metabolism by the lipid-responsive non-coding RNA LeXis. *Nature* **534**, 124–128 (2016).
48. Soria, L. F. *et al.* Association between a specific apolipoprotein B mutation and familial defective apolipoprotein B-100. *Proc Natl Acad Sci U S A* **86**, 587–591 (1989).
49. Shen, H. *et al.* Familial Defective Apolipoprotein B-100 and Increased Low-Density Lipoprotein Cholesterol and Coronary Artery Calcification in the Old Order Amish. *Arch Intern Med* **170**, 1850 (2010).
50. Pollin, T. I. *et al.* A Null Mutation in Human APOC3 Confers a Favorable Plasma Lipid Profile and Apparent Cardioprotection \* NIH Public Access. *Science* (1979) **322**, 1702–1705 (2008).
51. Casper, J. *et al.* The UCSC Genome Browser database: 2018 update. *Nucleic Acids Res* **46**, D762–D769 (2018).
52. Lumley, T., Brody, J., Peloso, G., Morrison, A. & Rice, K. FastSKAT: Sequence kernel association tests for very large sets of markers. *Genet Epidemiol* **42**, 516 (2018).
53. Kircher, M. *et al.* A general framework for estimating the relative pathogenicity of human genetic variants. *Nat Genet* **46**, 310–315 (2014).
54. Huang, Y. F., Gulko, B. & Siepel, A. Fast, scalable prediction of deleterious noncoding variants from functional and population genomic data. *Nat Genet* **49**, 618–624 (2017).
55. Rogers, M. F. *et al.* FATHMM-XF: Accurate prediction of pathogenic point mutations via extended features. *Bioinformatics* **34**, 511–513 (2018).
56. Ramdas, S. *et al.* A multi-layer functional genomic analysis to understand noncoding genetic variation in lipids. *Am J Hum Genet* **109**, 1366–1387 (2022).
